# Supplementary material for: The Phosphoproteome of the Degenerating rd1 Retina Changes After Protein Kinase G Inhibition
Source: Preprints.org preprint supplement (doi:10.20944/preprints202305.0896.v1), 2023-05-12
Supplement: Supplementary file 1 [file supplementary]

## Sheet: lower regulated sites
Lower phosphorylated sites after 2 hours PKG inhibition
Unipro Accession	Gene symbol	Protein name	position	residue	FoldChange	“-log10pval”		Proteins overlapped with lower phosphorylated proteins under 2 hours PKG inhibition
P30260	CDC27	cell division cycle 27	352	S	-2.89393	2.49434
P30260	CDC27	cell division cycle 27	353	S	-2.89393	2.49434
P30260	CDC27	cell division cycle 27	365	S	-2.89393	2.49434
P30260	CDC27	cell division cycle 27	357	T	-2.89393	2.49434
P30260	CDC27	cell division cycle 27	359	T	-2.89393	2.49434
Q8WXX7	AUTS2	activator of transcription and developmental regulator AUTS2	801	S	-2.63778	1.32882
Q8WXX7	AUTS2	activator of transcription and developmental regulator AUTS2	798	T	-2.63778	1.32882
Q8TDJ6	DMXL2	Dmx like 2	2017	T	-2.15046	2.0565
Q8TDJ6	DMXL2	Dmx like 2	2028	T	-2.15046	2.0565
Q13492	PICALM	phosphatidylinositol binding clathrin assembly protein	359	S	-2.10047	1.34487
Q13492	PICALM	phosphatidylinositol binding clathrin assembly protein	378	S	-2.10047	1.34487
Q13492	PICALM	phosphatidylinositol binding clathrin assembly protein	355	T	-2.10047	1.34487
Q13492	PICALM	phosphatidylinositol binding clathrin assembly protein	370	T	-2.10047	1.34487
Q6Q0C0	TRAF7	TNF receptor associated factor 7	32	S	-2.09967	2.14969
Q8TEW8	PARD3B	par-3 family cell polarity regulator beta	141	S	-2.06904	2.32502
P49418	AMPH	amphiphysin	262	S	-2.05131	2.40034
P49418	AMPH	amphiphysin	268	S	-2.05131	2.40034
P49418	AMPH	amphiphysin	276	S	-2.05131	2.40034
Q676U5	ATG16L1	autophagy related 16 like 1	255	S	-2.00625	2.12385
Q676U5	ATG16L1	autophagy related 16 like 1	251	T	-2.00625	2.12385
Q676U5	ATG16L1	autophagy related 16 like 1	254	T	-2.00625	2.12385
Q969K3	RNF34	ring finger protein 34	258	S	-1.98026	2.18317
Q969K3	RNF34	ring finger protein 34	260	S	-1.98026	2.18317
Q9UKV3	ACIN1	apoptotic chromatin condensation inducer 1	863	S	-1.93427	1.64309
O14994	SYN3	synapsin III	418	S	-1.75923	1.31746
Q9C005	DPY30	dpy-30 histone methyltransferase complex regulatory subunit	26	S	-1.75921	1.30184
Q9C005	DPY30	dpy-30 histone methyltransferase complex regulatory subunit	11	T	-1.75921	1.30184
Q8N1G0	ZNF687	zinc finger protein 687	243	S	-1.74714	1.89223
Q8N1G0	ZNF687	zinc finger protein 687	252	S	-1.74714	1.89223
Q8N1G0	ZNF687	zinc finger protein 687	254	S	-1.74714	1.89223
P56545-2	CTBP2	C-terminal binding protein 2	13	S	-1.73628	1.43887
P56545-2	CTBP2	C-terminal binding protein 2	15	S	-1.73628	1.43887
Q3V6T2	CCDC88A	coiled-coil domain containing 88A	1677	S	-1.69611	1.63582
Q3V6T2	CCDC88A	coiled-coil domain containing 88A	1680	S	-1.69611	1.63582
Q9NY59	SMPD3	sphingomyelin phosphodiesterase 3	183	S	-1.66586	4.09477
Q9NY59	SMPD3	sphingomyelin phosphodiesterase 3	175	T	-1.66586	4.09477
Q9NY59	SMPD3	sphingomyelin phosphodiesterase 3	177	T	-1.66586	4.09477
Q9NY59	SMPD3	sphingomyelin phosphodiesterase 3	3	Y	-1.66586	4.09477
P30414	NKTR	natural killer cell triggering receptor	609	S	-1.58307	1.61982
P30414	NKTR	natural killer cell triggering receptor	611	S	-1.58307	1.61982
P30414	NKTR	natural killer cell triggering receptor	615	S	-1.58307	1.61982
Q15233	NONO	non-POU domain containing octamer binding	412	T	-1.55397	1.86767
Q9Y5S9	RBM8A	RNA binding motif protein 8A	56	S	-1.50857	1.48084
O60749	SNX2	sorting nexin 2	94	S	-1.50026	1.85633
O60749	SNX2	sorting nexin 2	97	S	-1.50026	1.85633
O60749	SNX2	sorting nexin 2	104	T	-1.50026	1.85633
O60749	SNX2	sorting nexin 2	106	T	-1.50026	1.85633
O60749	SNX2	sorting nexin 2	107	T	-1.50026	1.85633
O95343	SIX3	SIX homeobox 3	294	S	-1.45204	1.59735
O95343	SIX3	SIX homeobox 3	303	S	-1.45204	1.59735
O95343	SIX3	SIX homeobox 3	291	T	-1.45204	1.59735
O94827	PLEKHG5	pleckstrin homology and RhoGEF domain containing G5	962	S	-1.37178	2.28763
O94827	PLEKHG5	pleckstrin homology and RhoGEF domain containing G5	964	S	-1.37178	2.28763
O94827	PLEKHG5	pleckstrin homology and RhoGEF domain containing G5	2	T	-1.37178	2.28763
Q9UI36	DACH1	dachshund family transcription factor 1	574	S	-1.32642	1.46412
Q9UI36	DACH1	dachshund family transcription factor 1	571	T	-1.32642	1.46412
Q9UI36	DACH1	dachshund family transcription factor 1	575	T	-1.32642	1.46412
P41743	PRKCI	protein kinase C iota	410	S	-1.32118	1.57352
P41743	PRKCI	protein kinase C iota	408	T	-1.32118	1.57352
P41743	PRKCI	protein kinase C iota	411	T	-1.32118	1.57352
P41743	PRKCI	protein kinase C iota	415	T	-1.32118	1.57352
P11137	MAP2	microtubule associated protein 2	309	S	-1.26974	1.8745
P11137	MAP2	microtubule associated protein 2	313	S	-1.26974	1.8745
P11137	MAP2	microtubule associated protein 2	319	S	-1.26974	1.8745
Q9P2R6	RERE	arginine-glutamic acid dipeptide repeats	1098	S	-1.26777	1.73102
Q9P2R6	RERE	arginine-glutamic acid dipeptide repeats	1105	S	-1.26777	1.73102
Q9P2R6	RERE	arginine-glutamic acid dipeptide repeats	1107	S	-1.26777	1.73102
Q8NFP9	NBEA	neurobeachin	1596	S	-1.25301	1.38844
Q8NFP9	NBEA	neurobeachin	1599	S	-1.25301	1.38844
Q8NFP9	NBEA	neurobeachin	1598	T	-1.25301	1.38844
Q8NFP9	NBEA	neurobeachin	1600	T	-1.25301	1.38844
Q96G46	DUS3L	dihydrouridine synthase 3 like	263	S	-1.23175	1.72985
Q96G46	DUS3L	dihydrouridine synthase 3 like	264	S	-1.23175	1.72985
Q96G46	DUS3L	dihydrouridine synthase 3 like	260	T	-1.23175	1.72985
P56211	ARPP19	cAMP regulated phosphoprotein 19	104	S	-1.17276	1.76315
P56211	ARPP19	cAMP regulated phosphoprotein 19	108	S	-1.17276	1.76315
Q9ULH7	MRTFB	myocardin related transcription factor B	207	S	-1.14813	1.54234
Q9ULH7	MRTFB	myocardin related transcription factor B	209	S	-1.14813	1.54234
Q8N2M8	CLASRP	CLK4 associating serine/arginine rich protein	331	S	-1.12749	1.44988
Q8N2M8	CLASRP	CLK4 associating serine/arginine rich protein	335	S	-1.12749	1.44988
Q8N2M8	CLASRP	CLK4 associating serine/arginine rich protein	349	S	-1.12749	1.44988
Q8N2M8	CLASRP	CLK4 associating serine/arginine rich protein	327	T	-1.12749	1.44988
Q8N2M8	CLASRP	CLK4 associating serine/arginine rich protein	330	T	-1.12749	1.44988
Q16512	PKN1	protein kinase N1	577	S	-1.10577	1.56147
Q16512	PKN1	protein kinase N1	582	S	-1.10577	1.56147
Q16512	PKN1	protein kinase N1	595	S	-1.10577	1.56147
L0R8F8	None	mitochondrial elongation factor 1	94	S	-1.09526	1.37509
L0R8F8	None	mitochondrial elongation factor 1	97	T	-1.09526	1.37509
L0R8F8	None	mitochondrial elongation factor 1	100	T	-1.09526	1.37509
Q12929	EPS8	epidermal growth factor receptor pathway substrate 8	621	S	-1.0919	1.6578
Q12929	EPS8	epidermal growth factor receptor pathway substrate 8	624	S	-1.0919	1.6578
Q12929	EPS8	epidermal growth factor receptor pathway substrate 8	619	T	-1.0919	1.6578
Q12929	EPS8	epidermal growth factor receptor pathway substrate 8	628	T	-1.0919	1.6578
Q15459	SF3A1	splicing factor 3a subunit 1	329	S	-1.0916	2.63939
Q9C0H9	SRCIN1	SRC kinase signaling inhibitor 1	933	S	-1.06907	1.53654
Q02880	TOP2B	DNA topoisomerase II beta	1453	S	-1.05812	2.09966
Q02880	TOP2B	DNA topoisomerase II beta	1458	T	-1.05812	2.09966
P51532	SMARCA4	SWI/SNF related, matrix associated, actin dependent regulator of chromatin, subfamily a, member 4	610	S	-1.05217	1.6338
P51532	SMARCA4	SWI/SNF related, matrix associated, actin dependent regulator of chromatin, subfamily a, member 4	613	S	-1.05217	1.6338
P51532	SMARCA4	SWI/SNF related, matrix associated, actin dependent regulator of chromatin, subfamily a, member 4	4	T	-1.05217	1.6338
P51532	SMARCA4	SWI/SNF related, matrix associated, actin dependent regulator of chromatin, subfamily a, member 4	609	T	-1.05217	1.6338
Q12888	TP53BP1	tumor protein p53 binding protein 1	716	S	-1.04791	2.8438
Q12888	TP53BP1	tumor protein p53 binding protein 1	719	S	-1.04791	2.8438
Q96PK6	RBM14	RNA binding motif protein 14	555	S	-1.02814	1.94588
Q96PK6	RBM14	RNA binding motif protein 14	560	S	-1.02814	1.94588
Q96PK6	RBM14	RNA binding motif protein 14	562	S	-1.02814	1.94588
Q96PK6	RBM14	RNA binding motif protein 14	571	S	-1.02814	1.94588
Q96PK6	RBM14	RNA binding motif protein 14	551	T	-1.02814	1.94588
Q96PK6	RBM14	RNA binding motif protein 14	572	T	-1.02814	1.94588
P0C7T5	ATXN1L	ataxin 1 like	202	S	-1.02663	2.3857
P0C7T5	ATXN1L	ataxin 1 like	203	S	-1.02663	2.3857
P0C7T5	ATXN1L	ataxin 1 like	206	S	-1.02663	2.3857
P0C7T5	ATXN1L	ataxin 1 like	215	S	-1.02663	2.3857
P0C7T5	ATXN1L	ataxin 1 like	217	T	-1.02663	2.3857
Q8WWM7-2	ATXN2L	ataxin 2 like	631	S	-1.02504	3.318
Q8WWM7-2	ATXN2L	ataxin 2 like	629	T	-1.02504	3.318
Q9UGV2	NDRG3	NDRG family member 3	331	S	-1.01919	1.40994
Q9UGV2	NDRG3	NDRG family member 3	333	S	-1.01919	1.40994
Q9UGV2	NDRG3	NDRG family member 3	334	S	-1.01919	1.40994
Q9UGV2	NDRG3	NDRG family member 3	335	S	-1.01919	1.40994
Q9UGV2	NDRG3	NDRG family member 3	338	S	-1.01919	1.40994
Q9UGV2	NDRG3	NDRG family member 3	329	T	-1.01919	1.40994
Q15233	NONO	non-POU domain containing octamer binding	420	T	-1.0186	1.67868
Q15233	NONO	non-POU domain containing octamer binding	426	T	-1.0186	1.67868
Q15233	NONO	non-POU domain containing octamer binding	430	T	-1.0186	1.67868
Q9BUL5	PHF23	PHD finger protein 23	147	S	-1.01622	2.86811
Q9BUL5	PHF23	PHD finger protein 23	150	S	-1.01622	2.86811
Q9BUL5	PHF23	PHD finger protein 23	157	T	-1.01622	2.86811
Q9BYJ9	YTHDF1	YTH N6-methyladenosine RNA binding protein 1	284	S	-0.999928	1.33063
Q9BYJ9	YTHDF1	YTH N6-methyladenosine RNA binding protein 1	291	S	-0.999928	1.33063
Q9BYJ9	YTHDF1	YTH N6-methyladenosine RNA binding protein 1	289	T	-0.999928	1.33063
Q92558	WASF1	WASP family member 1	321	S	-0.987364	1.60905
Q92558	WASF1	WASP family member 1	333	S	-0.987364	1.60905
Q92558	WASF1	WASP family member 1	336	S	-0.987364	1.60905
Q92558	WASF1	WASP family member 1	338	S	-0.987364	1.60905
Q92558	WASF1	WASP family member 1	316	T	-0.987364	1.60905
Q92558	WASF1	WASP family member 1	323	T	-0.987364	1.60905
Q86UR5	RIMS1	regulating synaptic membrane exocytosis 1	1448	S	-0.975044	2.1481
Q86UR5	RIMS1	regulating synaptic membrane exocytosis 1	1450	S	-0.975044	2.1481
Q86UR5	RIMS1	regulating synaptic membrane exocytosis 1	1454	S	-0.975044	2.1481
Q8IY67	RAVER1	ribonucleoprotein, PTB binding 1	466	T	-0.965968	2.36626
Q8IY67	RAVER1	ribonucleoprotein, PTB binding 1	469	T	-0.965968	2.36626
P14136	GFAP	glial fibrillary acidic protein	12	S	-0.959464	1.87991
Q9Y4B5	MTCL1	microtubule crosslinking factor 1	255	S	-0.95245	1.38586
Q04637	EIF4G1	eukaryotic translation initiation factor 4 gamma 1	1231	S	-0.941367	1.95423
O60885	BRD4	bromodomain containing 4	470	S	-0.909926	1.89589
O60885	BRD4	bromodomain containing 4	471	S	-0.909926	1.89589
O60885	BRD4	bromodomain containing 4	468	T	-0.909926	1.89589
Q9Y2I1-6	NISCH-6	Nischarin isoform 6	492	S	-0.905012	1.30303
Q9Y2I1-6	NISCH-6	Nischarin isoform 6	499	S	-0.905012	1.30303
Q9Y2I1-6	NISCH-6	Nischarin isoform 6	501	S	-0.905012	1.30303
Q8WUI4	HDAC7	histone deacetylase 7	344	S	-0.874437	2.36799
Q8WUI4	HDAC7	histone deacetylase 7	350	S	-0.874437	2.36799
Q8WUI4	HDAC7	histone deacetylase 7	354	S	-0.874437	2.36799
O43432	EIF4G3	eukaryotic translation initiation factor 4 gamma 3	277	S	-0.867097	1.47187
O43432	EIF4G3	eukaryotic translation initiation factor 4 gamma 3	278	S	-0.867097	1.47187
O43432	EIF4G3	eukaryotic translation initiation factor 4 gamma 3	281	S	-0.867097	1.47187
O43432	EIF4G3	eukaryotic translation initiation factor 4 gamma 3	284	S	-0.867097	1.47187
O43432	EIF4G3	eukaryotic translation initiation factor 4 gamma 3	288	S	-0.867097	1.47187
O43432	EIF4G3	eukaryotic translation initiation factor 4 gamma 3	289	S	-0.867097	1.47187
Q8IVA1	PCP2	Purkinje cell protein 2	71	S	-0.865493	1.55584
Q8IVA1	PCP2	Purkinje cell protein 2	68	T	-0.865493	1.55584
Q8WWM7-2	ATXN2L	ataxin 2 like	56	S	-0.853926	2.39529
Q9NRS6	SNX15	sorting nexin 15	148	T	-0.852957	1.52724
Q96CB8	INTS12	integrator complex subunit 12	388	S	-0.852618	1.30946
Q96CB8	INTS12	integrator complex subunit 12	390	S	-0.852618	1.30946
Q96CB8	INTS12	integrator complex subunit 12	391	S	-0.852618	1.30946
Q08050	FOXM1	forkhead box M1	121	S	-0.846135	2.61355
Q08050	FOXM1	forkhead box M1	129	S	-0.846135	2.61355
Q08050	FOXM1	forkhead box M1	114	T	-0.846135	2.61355
Q08050	FOXM1	forkhead box M1	115	Y	-0.846135	2.61355
P20941	PDC	phosducin	6	S	-0.835457	1.45483
P20941	PDC	phosducin	8	S	-0.835457	1.45483
P11137	MAP2	microtubule associated protein 2	238	S	-0.82657	1.72543
P11137	MAP2	microtubule associated protein 2	242	S	-0.82657	1.72543
P11137	MAP2	microtubule associated protein 2	247	S	-0.82657	1.72543
P11137	MAP2	microtubule associated protein 2	239	T	-0.82657	1.72543
Q9Y4B5	MTCL1	microtubule crosslinking factor 1	277	S	-0.818642	2.30632
Q9Y4B5	MTCL1	microtubule crosslinking factor 1	282	S	-0.818642	2.30632
O60551	NMT2	N-myristoyltransferase 2	38	S	-0.815766	2.38069
Q96RK0	CIC	capicua transcriptional repressor	2123	S	-0.812742	1.34742
Q96RK0	CIC	capicua transcriptional repressor	2130	T	-0.812742	1.34742
Q13522	PPP1R1A	protein phosphatase 1 regulatory inhibitor subunit 1A	9	T	-0.809455	3.1078
Q13522	PPP1R1A	protein phosphatase 1 regulatory inhibitor subunit 1A	35	T	-0.809455	3.1078
Q13522	PPP1R1A	protein phosphatase 1 regulatory inhibitor subunit 1A	38	T	-0.809455	3.1078
O75175	CNOT3	CCR4-NOT transcription complex subunit 3	504	S	-0.79749	1.39968
O75175	CNOT3	CCR4-NOT transcription complex subunit 3	505	S	-0.79749	1.39968
O75175	CNOT3	CCR4-NOT transcription complex subunit 3	507	T	-0.79749	1.39968
Q8WWM7-2	ATXN2L	ataxin 2 like	27	S	-0.795415	1.32738
Q8WWM7-2	ATXN2L	ataxin 2 like	32	S	-0.795415	1.32738
Q8WWM7-2	ATXN2L	ataxin 2 like	43	T	-0.795415	1.32738
Q8WWM7-2	ATXN2L	ataxin 2 like	45	T	-0.795415	1.32738
Q969V6	MRTFA	myocardin related transcription factor A	840	S	-0.793891	1.31017
Q8TC07	TBC1D15	TBC1 domain family member 15	655	S	-0.768839	1.39136
Q8TC07	TBC1D15	TBC1 domain family member 15	657	T	-0.768839	1.39136
O75420	GIGYF1	GRB10 interacting GYF protein 1	540	S	-0.767841	1.60175
Q86U44	METTL3	methyltransferase 3, N6-adenosine-methyltransferase complex catalytic subunit	43	S	-0.766606	2.4656
Q86U44	METTL3	methyltransferase 3, N6-adenosine-methyltransferase complex catalytic subunit	45	T	-0.766606	2.4656
Q86U86	PBRM1	polybromo 1	10	S	-0.751439	1.43633
Q86U86	PBRM1	polybromo 1	13	S	-0.751439	1.43633
Q86U86	PBRM1	polybromo 1	14	S	-0.751439	1.43633
Q8WWM7-2	ATXN2L	ataxin 2 like	474	S	-0.749509	2.05039
Q8WWM7-2	ATXN2L	ataxin 2 like	488	S	-0.749509	2.05039
Q8WWM7-2	ATXN2L	ataxin 2 like	490	S	-0.749509	2.05039
Q8WWM7-2	ATXN2L	ataxin 2 like	493	S	-0.749509	2.05039
Q92567	FAM168A	family with sequence similarity 168 member A	6	S	-0.743319	2.08388
Q9H6E5	TUT1	terminal uridylyl transferase 1, U6 snRNA-specific	655	S	-0.741662	2.2252
Q8IWZ8	SUGP1	SURP and G-patch domain containing 1	133	S	-0.730999	1.52876
Q8IWZ8	SUGP1	SURP and G-patch domain containing 1	134	S	-0.730999	1.52876
Q8IWZ8	SUGP1	SURP and G-patch domain containing 1	136	T	-0.730999	1.52876
Q8TAQ2	SMARCC2	SWI/SNF related, matrix associated, actin dependent regulator of chromatin subfamily c member 2	356	T	-0.71819	1.92489
P78347	GTF2I	general transcription factor IIi	210	S	-0.716084	1.69835
Q8WWM9	CYGB	cytoglobin	187	S	-0.709266	1.64781
Q8WWM9	CYGB	cytoglobin	178	T	-0.709266	1.64781
Q8WWM9	CYGB	cytoglobin	179	T	-0.709266	1.64781
Q8WWM9	CYGB	cytoglobin	180	T	-0.709266	1.64781
P62136	PPP1CA	protein phosphatase 1 catalytic subunit alpha	310	S	-0.705751	1.57209
P62136	PPP1CA	protein phosphatase 1 catalytic subunit alpha	320	T	-0.705751	1.57209
Q7Z5J4	RAI1	retinoic acid induced 1	899	S	-0.699515	1.57434
Q7Z5J4	RAI1	retinoic acid induced 1	904	S	-0.699515	1.57434
Q9H0D6	XRN2	5'-3' exoribonuclease 2	479	S	-0.692901	1.89665
Q9H0D6	XRN2	5'-3' exoribonuclease 2	482	S	-0.692901	1.89665
Q9H0D6	XRN2	5'-3' exoribonuclease 2	485	S	-0.692901	1.89665
Q6IN85	PPP4R3A	protein phosphatase 4 regulatory subunit 3A	126	S	-0.682082	1.63427
Q6IN85	PPP4R3A	protein phosphatase 4 regulatory subunit 3A	127	S	-0.682082	1.63427
P85037	FOXK1	forkhead box K1	235	S	-0.676935	1.62143
P85037	FOXK1	forkhead box K1	239	S	-0.676935	1.62143
P85037	FOXK1	forkhead box K1	243	S	-0.676935	1.62143
P85037	FOXK1	forkhead box K1	231	T	-0.676935	1.62143
Q92539	LPIN2	lipin 2	106	S	-0.6571	1.87906
Q92539	LPIN2	lipin 2	105	T	-0.6571	1.87906
Q8N573	OXR1	oxidation resistance 1	343	S	-0.637093	1.40226
Q8N573	OXR1	oxidation resistance 1	346	S	-0.637093	1.40226
Q8N573	OXR1	oxidation resistance 1	341	T	-0.637093	1.40226
Q92793	CREBBP	CREB binding protein	978	S	-0.633813	2.12659
Q92793	CREBBP	CREB binding protein	981	S	-0.633813	2.12659
Q92793	CREBBP	CREB binding protein	984	T	-0.633813	2.12659
P51817	PRKX	protein kinase X-linked	198	T	-0.625742	1.63037
P51817	PRKX	protein kinase X-linked	200	T	-0.625742	1.63037
P51817	PRKX	protein kinase X-linked	204	T	-0.625742	1.63037
Q6ZMT1	STAC2	SH3 and cysteine rich domain 2	78	S	-0.606249	1.7358
O43312	MTSS1	MTSS I-BAR domain containing 1	4	S	-0.586796	1.586
O43312	MTSS1	MTSS I-BAR domain containing 1	636	S	-0.586796	1.586
O43312	MTSS1	MTSS I-BAR domain containing 1	624	T	-0.586796	1.586
O43312	MTSS1	MTSS I-BAR domain containing 1	626	T	-0.586796	1.586
Q96JM3	CHAMP1	chromosome alignment maintaining phosphoprotein 1	138	S	-0.584913	1.51397
Q96JM3	CHAMP1	chromosome alignment maintaining phosphoprotein 1	140	S	-0.584913	1.51397
Q96JM3	CHAMP1	chromosome alignment maintaining phosphoprotein 1	148	S	-0.584913	1.51397
Q01484	ANK2	ankyrin 2	2653	S	-0.581967	1.58898
Q01484	ANK2	ankyrin 2	2657	S	-0.581967	1.58898
Q01484	ANK2	ankyrin 2	2658	S	-0.581967	1.58898
Q01484	ANK2	ankyrin 2	2669	T	-0.581967	1.58898
Q9C0E8	LNPK	lunapark, ER junction formation factor	411	S	-0.578464	2.04481
P20941	PDC	phosducin	18	T	-0.576596	1.39119
P20941	PDC	phosducin	20	T	-0.576596	1.39119
P00533	EGFR	epidermal growth factor receptor	695	T	-0.555315	1.35623
Q9P2Q2	FRMD4A	FERM domain containing 4A	642	S	-0.548081	1.54182
Q8NBR6	MINDY2	MINDY lysine 48 deubiquitinase 2	21	S	-0.542483	1.44208
O95394	PGM3	phosphoglucomutase 3	64	S	-0.54034	1.36475
O95394	PGM3	phosphoglucomutase 3	62	T	-0.54034	1.36475
Q9NQV8	PRDM8	PR/SET domain 8	508	S	-0.530119	1.56418
Q9NQV8	PRDM8	PR/SET domain 8	511	S	-0.530119	1.56418
Q92551	IP6K1	inositol hexakisphosphate kinase 1	139	S	-0.524138	2.09967
Q01484	ANK2	ankyrin 2	3053	S	-0.521711	1.83544
Q01484	ANK2	ankyrin 2	3044	T	-0.521711	1.83544
Q01484	ANK2	ankyrin 2	3046	T	-0.521711	1.83544
Q01484	ANK2	ankyrin 2	3050	T	-0.521711	1.83544
P27816-4	MAP4	Microtubule-associated protein 4 isoform 4	444	S	-0.50858	1.42069
O14497	ARID1A	AT-rich interaction domain 1A	1183	S	-0.505657	1.75904
O14497	ARID1A	AT-rich interaction domain 1A	1185	S	-0.505657	1.75904
P55196	AFDN	afadin, adherens junction formation factor	1719	S	-0.49895	1.33887
P54727	RAD23B	RAD23 homolog B, nucleotide excision repair protein	253	S	-0.496195	1.39629
P54727	RAD23B	RAD23 homolog B, nucleotide excision repair protein	262	T	-0.496195	1.39629
P54727	RAD23B	RAD23 homolog B, nucleotide excision repair protein	270	T	-0.496195	1.39629
O60268	KIAA0513	KIAA0513	72	S	-0.492346	1.32485
O60268	KIAA0513	KIAA0513	73	S	-0.492346	1.32485
O60268	KIAA0513	KIAA0513	74	S	-0.492346	1.32485
O60268	KIAA0513	KIAA0513	80	S	-0.492346	1.32485
O60268	KIAA0513	KIAA0513	83	S	-0.492346	1.32485
O60268	KIAA0513	KIAA0513	86	S	-0.492346	1.32485
Q13522	PPP1R1A	protein phosphatase 1 regulatory inhibitor subunit 1A	65	S	-0.488585	1.79068
Q13522	PPP1R1A	protein phosphatase 1 regulatory inhibitor subunit 1A	67	S	-0.488585	1.79068
Q92793	CREBBP	CREB binding protein	2064	S	-0.474762	1.43864
Q7Z2K8	GPRIN1	G protein regulated inducer of neurite outgrowth 1	182	S	-0.467167	1.483
Q7Z2K8	GPRIN1	G protein regulated inducer of neurite outgrowth 1	190	S	-0.467167	1.483
Q15911	ZFHX3	zinc finger homeobox 3	417	S	-0.465725	1.41212
Q15911	ZFHX3	zinc finger homeobox 3	425	S	-0.465725	1.41212
Q15911	ZFHX3	zinc finger homeobox 3	426	S	-0.465725	1.41212
Q15911	ZFHX3	zinc finger homeobox 3	428	T	-0.465725	1.41212
Q9H4Z3	PCIF1	phosphorylated CTD interacting factor 1	152	T	-0.462586	1.32353
P47736	RAP1GAP	RAP1 GTPase activating protein	498	S	-0.453798	1.82355
P47736	RAP1GAP	RAP1 GTPase activating protein	499	S	-0.453798	1.82355
Q92777	SYN2	synapsin II	426	S	-0.437515	1.45907
O15014	ZNF609	zinc finger protein 609	467	S	-0.42069	1.32441
O15014	ZNF609	zinc finger protein 609	470	S	-0.42069	1.32441
O15014	ZNF609	zinc finger protein 609	465	T	-0.42069	1.32441
Q6NZY4	ZCCHC8	zinc finger CCHC-type containing 8	407	S	-0.417345	1.32993
Q6NZY4	ZCCHC8	zinc finger CCHC-type containing 8	411	S	-0.417345	1.32993
Q9UHB7	AFF4	AF4/FMR2 family member 4	809	S	-0.408706	1.3049

## Sheet: higher regulated sites
higher phosphorylated sites after 2 hours PKG inhibition
Unipro Accession	Gene symbol	Protein name	position	residue	FoldChange	“-log10pval”		Proteins overlapped with higher phosphorylated proteins under 2 hours PKG inhibition
Q9BUJ2	HNRNPUL1	heterogeneous nuclear ribonucleoprotein U like 1	195	S	3.34255	2.25564
P24534	EEF1B2	eukaryotic translation elongation factor 1 beta 2	106	S	2.59266	2.7116
Q00839	HNRNPU	heterogeneous nuclear ribonucleoprotein U	247	S	2.24188	1.45142
O00178	GTPBP1	GTP binding protein 1	44	S	2.16534	1.92808
O00178	GTPBP1	GTP binding protein 1	47	S	2.16534	1.92808
P27816	MAP4	microtubule associated protein 4	475	S	2.16096	1.58468
Q5VIR6	VPS53	VPS53 subunit of GARP complex	377	S	2.08287	1.42612
Q5VIR6	VPS53	VPS53 subunit of GARP complex	382	T	2.08287	1.42612
P48681	NES	nestin	623	S	1.72451	1.31465
P48681	NES	nestin	630	T	1.72451	1.31465
Q6PKG0	LARP1	La ribonucleoprotein 1, translational regulator	800	S	1.64987	1.45053
Q6PKG0	LARP1	La ribonucleoprotein 1, translational regulator	801	S	1.64987	1.45053
Q6PKG0	LARP1	La ribonucleoprotein 1, translational regulator	807	S	1.64987	1.45053
Q14004	CDK13	cyclin dependent kinase 13	1225	T	1.62082	1.62824
P55196	AFDN	afadin, adherens junction formation factor	1199	S	1.32295	1.92672
P55196	AFDN	afadin, adherens junction formation factor	1201	S	1.32295	1.92672
P55196	AFDN	afadin, adherens junction formation factor	1198	T	1.32295	1.92672
P55196	AFDN	afadin, adherens junction formation factor	1202	T	1.32295	1.92672
P55196	AFDN	afadin, adherens junction formation factor	1207	T	1.32295	1.92672
P49023	PXN	paxillin	130	S	1.28443	3.10456
P49023	PXN	paxillin	135	S	1.28443	3.10456
P49023	PXN	paxillin	136	S	1.28443	3.10456
P49023	PXN	paxillin	137	S	1.28443	3.10456
P49023	PXN	paxillin	132	T	1.28443	3.10456
Q9UKL0	RCOR1	REST corepressor 1	254	S	1.27483	1.60937
Q9UKL0	RCOR1	REST corepressor 1	264	S	1.27483	1.60937
Q9UKL0	RCOR1	REST corepressor 1	261	T	1.27483	1.60937
Q06455	RUNX1T1	RUNX1 partner transcriptional co-repressor 1	390	S	1.23009	1.41005
O43719	HTATSF1	HIV-1 Tat specific factor 1	724	S	1.19912	1.79029
P61129	ZC3H6	zinc finger CCCH-type containing 6	452	S	1.14291	1.76136
P61129	ZC3H6	zinc finger CCCH-type containing 6	454	S	1.14291	1.76136
P61129	ZC3H6	zinc finger CCCH-type containing 6	453	T	1.14291	1.76136
P15056	BRAF	B-Raf proto-oncogene, serine/threonine kinase	483	S	1.12694	1.50579
P15056	BRAF	B-Raf proto-oncogene, serine/threonine kinase	484	S	1.12694	1.50579
P80723	BASP1	brain abundant membrane attached signal protein 1	54	S	1.1224	3.36089
P80723	BASP1	brain abundant membrane attached signal protein 1	49	T	1.1224	3.36089
P80723	BASP1	brain abundant membrane attached signal protein 1	55	T	1.1224	3.36089
Q9UPR0	PLCL2	phospholipase C like 2	16	S	1.08618	1.51898
Q9UPR0	PLCL2	phospholipase C like 2	18	S	1.08618	1.51898
Q9UPR0	PLCL2	phospholipase C like 2	15	T	1.08618	1.51898
Q9NRA0	SPHK2	sphingosine kinase 2	364	S	1.01202	2.43567
Q9NRA0	SPHK2	sphingosine kinase 2	379	S	1.01202	2.43567
O43236	SEPTIN4	septin 4	432	S	0.987217	1.32982
O43236	SEPTIN4	septin 4	429	T	0.987217	1.32982
P11137	MAP2	microtubule associated protein 2	883	S	0.982308	1.46398
P11137	MAP2	microtubule associated protein 2	892	S	0.982308	1.46398
P11137	MAP2	microtubule associated protein 2	878	T	0.982308	1.46398
Q9H9P5	UNKL	unk like zinc finger	13	S	0.98059	1.79534
P46821	MAP1B	microtubule associated protein 1B	1253	S	0.962739	1.35601
P46821	MAP1B	microtubule associated protein 1B	1255	S	0.962739	1.35601
P46821	MAP1B	microtubule associated protein 1B	1257	S	0.962739	1.35601
P46821	MAP1B	microtubule associated protein 1B	1260	S	0.962739	1.35601
Q14839	CHD4	chromodomain helicase DNA binding protein 4	1535	T	0.960716	1.54909
Q14839	CHD4	chromodomain helicase DNA binding protein 4	1538	T	0.960716	1.54909
Q14839	CHD4	chromodomain helicase DNA binding protein 4	1542	T	0.960716	1.54909
Q14839	CHD4	chromodomain helicase DNA binding protein 4	1546	T	0.960716	1.54909
O15069	NACAD	NAC alpha domain containing	765	S	0.948198	1.33392
O15069	NACAD	NAC alpha domain containing	778	S	0.948198	1.33392
O15069	NACAD	NAC alpha domain containing	788	S	0.948198	1.33392
O15069	NACAD	NAC alpha domain containing	789	S	0.948198	1.33392
O15069	NACAD	NAC alpha domain containing	780	T	0.948198	1.33392
P51858	HDGF	heparin binding growth factor	132	S	0.942459	1.67096
P51858	HDGF	heparin binding growth factor	133	S	0.942459	1.67096
P55196	AFDN	afadin, adherens junction formation factor	1173	S	0.886276	1.97651
Q14247	CTTN	cortactin	11	S	0.886184	2.35308
Q14247	CTTN	cortactin	24	T	0.886184	2.35308
O14974	PPP1R12A	protein phosphatase 1 regulatory subunit 12A	299	S	0.884131	2.37296
P45983	MAPK8	mitogen-activated protein kinase 8	179	S	0.883467	1.7667
P45983	MAPK8	mitogen-activated protein kinase 8	178	T	0.883467	1.7667
P45983	MAPK8	mitogen-activated protein kinase 8	183	T	0.883467	1.7667
P45983	MAPK8	mitogen-activated protein kinase 8	188	T	0.883467	1.7667
O60271	SPAG9	sperm associated antigen 9	226	T	0.878679	1.66925
Q8N2F6	ARMC10	armadillo repeat containing 10	43	S	0.86491	1.61565
Q8TD55	PLEKHO2	pleckstrin homology domain containing O2	393	S	0.846773	1.76323
Q8TD55	PLEKHO2	pleckstrin homology domain containing O2	394	S	0.846773	1.76323
Q8TD55	PLEKHO2	pleckstrin homology domain containing O2	395	S	0.846773	1.76323
Q96G46	DUS3L	dihydrouridine synthase 3 like	247	S	0.84079	2.80539
Q96G46	DUS3L	dihydrouridine synthase 3 like	254	T	0.84079	2.80539
Q9P2R6	RERE	arginine-glutamic acid dipeptide repeats	656	S	0.839096	1.62033
P41587	VIPR2	vasoactive intestinal peptide receptor 2	414	S	0.838668	3.03961
P56545-2	CTBP2	C-terminal binding protein 2	531	S	0.834273	2.10432
P56545-2	CTBP2	C-terminal binding protein 2	533	S	0.834273	2.10432
P56545-2	CTBP2	C-terminal binding protein 2	539	S	0.834273	2.10432
A5PKW4	PSD	pleckstrin and Sec7 domain containing	720	S	0.8333	1.67611
A5PKW4	PSD	pleckstrin and Sec7 domain containing	722	S	0.8333	1.67611
A5PKW4	PSD	pleckstrin and Sec7 domain containing	2	T	0.8333	1.67611
P80723	BASP1	brain abundant membrane attached signal protein 1	180	S	0.793637	1.39138
P80723	BASP1	brain abundant membrane attached signal protein 1	183	T	0.793637	1.39138
Q12955	ANK3	ankyrin 3	1792	S	0.792211	1.52456
Q12955	ANK3	ankyrin 3	1795	S	0.792211	1.52456
Q9UK59	DBR1	debranching RNA lariats 1	479	S	0.790396	1.77918
Q9UK59	DBR1	debranching RNA lariats 1	480	S	0.790396	1.77918
Q9UK59	DBR1	debranching RNA lariats 1	489	S	0.790396	1.77918
Q9UK59	DBR1	debranching RNA lariats 1	491	S	0.790396	1.77918
A6NNA2	SRRM3	Serine/arginine repetitive matrix protein 3	116	T	0.777031	1.37477
Q9BPU6	DPYSL5	dihydropyrimidinase like 5	509	T	0.768283	1.51789
Q9BPU6	DPYSL5	dihydropyrimidinase like 5	514	T	0.768283	1.51789
P20020	ATP2B1	ATPase plasma membrane Ca2+ transporting 1	1155	S	0.767998	1.32599
P20020	ATP2B1	ATPase plasma membrane Ca2+ transporting 1	1165	T	0.767998	1.32599
P11717	IGF2R	insulin like growth factor 2 receptor	2392	S	0.725983	1.80318
P11717	IGF2R	insulin like growth factor 2 receptor	2401	S	0.725983	1.80318
Q9HCM4	EPB41L5	erythrocyte membrane protein band 4.1 like 5	385	S	0.725521	1.30248
Q9HCM4	EPB41L5	erythrocyte membrane protein band 4.1 like 5	386	T	0.725521	1.30248
Q9HCM4	EPB41L5	erythrocyte membrane protein band 4.1 like 5	387	T	0.725521	1.30248
Q15835	GRK1	G protein-coupled receptor kinase 1	491	S	0.710956	1.57395
Q15835	GRK1	G protein-coupled receptor kinase 1	492	T	0.710956	1.57395
O60716	CTNND1	catenin delta 1	268	S	0.707563	1.64842
O60716	CTNND1	catenin delta 1	269	S	0.707563	1.64842
O60701	UGDH	UDP-glucose 6-dehydrogenase	474	T	0.70003	1.83197
P48681	NES	nestin	728	S	0.676357	1.75019
P48681	NES	nestin	731	S	0.676357	1.75019
P48681	NES	nestin	772	S	0.676357	1.75019
P48681	NES	nestin	775	S	0.676357	1.75019
Q6DN90	IQSEC1	IQ motif and Sec7 domain ArfGEF 1	251	S	0.675372	1.68037
Q15154	PCM1	pericentriolar material 1	858	S	0.670638	1.30466
Q15154	PCM1	pericentriolar material 1	859	S	0.670638	1.30466
Q6P9H4	CNKSR3	CNKSR family member 3	800	S	0.667154	2.10201
Q6P9H4	CNKSR3	CNKSR family member 3	802	S	0.667154	2.10201
Q3V6T2	CCDC88A	coiled-coil domain containing 88A	1425	S	0.663619	1.54975
Q3V6T2	CCDC88A	coiled-coil domain containing 88A	1428	S	0.663619	1.54975
Q3V6T2	CCDC88A	coiled-coil domain containing 88A	1439	S	0.663619	1.54975
Q3V6T2	CCDC88A	coiled-coil domain containing 88A	1449	S	0.663619	1.54975
Q5JSH3	WDR44	WD repeat domain 44	399	S	0.653933	1.67324
Q5JSH3	WDR44	WD repeat domain 44	405	S	0.653933	1.67324
Q5JSH3	WDR44	WD repeat domain 44	403	T	0.653933	1.67324
Q9Y2D5	PALM2AKAP2	PALM2 and AKAP2 fusion	152	S	0.645854	1.31157
Q8IYB3	SRRM1	serine and arginine repetitive matrix 1	822	S	0.642157	1.62254
Q93100	PHKB	phosphorylase kinase regulatory subunit beta	692	S	0.634578	1.50674
Q93100	PHKB	phosphorylase kinase regulatory subunit beta	694	T	0.634578	1.50674
Q8N1G4	LRRC47	leucine rich repeat containing 47	510	S	0.623482	1.47554
Q8N1G4	LRRC47	leucine rich repeat containing 47	509	T	0.623482	1.47554
Q13480	GAB1	GRB2 associated binding protein 1	402	S	0.608952	1.72937
A7KAX9	ARHGAP32	Rho GTPase activating protein 32	612	S	0.60447	1.57346
A7KAX9	ARHGAP32	Rho GTPase activating protein 32	613	S	0.60447	1.57346
O00505	KPNA3	karyopherin subunit alpha 3	56	S	0.599504	1.51702
O00505	KPNA3	karyopherin subunit alpha 3	60	S	0.599504	1.51702
Q01484	ANK2	ankyrin 2	846	S	0.596591	1.82525
Q01484	ANK2	ankyrin 2	853	T	0.596591	1.82525
P33993	MCM7	minichromosome maintenance complex component 7	40	S	0.57558	1.6049
Q8N2M8	CLASRP	CLK4 associating serine/arginine rich protein	294	S	0.573331	1.39236
Q86YP4	GATAD2A	GATA zinc finger domain containing 2A	96	S	0.565465	1.33115
Q86YP4	GATAD2A	GATA zinc finger domain containing 2A	103	S	0.565465	1.33115
Q86YP4	GATAD2A	GATA zinc finger domain containing 2A	105	S	0.565465	1.33115
Q86YP4	GATAD2A	GATA zinc finger domain containing 2A	109	S	0.565465	1.33115
P80723	BASP1	brain abundant membrane attached signal protein 1	217	S	0.565105	1.82316
P80723	BASP1	brain abundant membrane attached signal protein 1	218	S	0.565105	1.82316
P80723	BASP1	brain abundant membrane attached signal protein 1	221	S	0.565105	1.82316
Q12959-2	DLG1	discs large MAGUK scaffold protein 1	399	S	0.548238	1.43164
Q12959-2	DLG1	discs large MAGUK scaffold protein 1	410	S	0.548238	1.43164
Q12959-2	DLG1	discs large MAGUK scaffold protein 1	407	T	0.548238	1.43164
Q12959-2	DLG1	discs large MAGUK scaffold protein 1	409	T	0.548238	1.43164
Q14004	CDK13	cyclin dependent kinase 13	1245	T	0.547034	1.66936
P11171-2	EPB41	Protein 4.1 isoform 2	184	T	0.542555	1.40281
O94875-2	SORBS2	sorbin and SH3 domain containing 2	343	S	0.5393	1.33074
O94875-2	SORBS2	sorbin and SH3 domain containing 2	345	S	0.5393	1.33074
O94875-2	SORBS2	sorbin and SH3 domain containing 2	347	S	0.5393	1.33074
O94875-2	SORBS2	sorbin and SH3 domain containing 2	348	T	0.5393	1.33074
P29966	MARCKS	myristoylated alanine rich protein kinase C substrate	63	S	0.537042	1.32429
Q9P206	KIAA1522	KIAA1522	543	S	0.533489	1.76154
Q6VMQ6	ATF7IP	activating transcription factor 7 interacting protein	707	S	0.530511	1.30421
Q32MZ4	LRRFIP1	LRR binding FLII interacting protein 1	302	S	0.52808	1.80488
Q9UDY2	TJP2	tight junction protein 2	442	T	0.520254	1.35473
Q9UDY2	TJP2	tight junction protein 2	446	T	0.520254	1.35473
P62070	RRAS2	RAS related 2	186	S	0.512273	1.4736
Q96PM9	ZNF385A	zinc finger protein 385A	160	S	0.48479	1.7299
Q96PM9	ZNF385A	zinc finger protein 385A	162	S	0.48479	1.7299
Q96PM9	ZNF385A	zinc finger protein 385A	165	S	0.48479	1.7299
P07910	HNRNPC	heterogeneous nuclear ribonucleoprotein C	231	S	0.46855	1.4902
P07910	HNRNPC	heterogeneous nuclear ribonucleoprotein C	232	S	0.46855	1.4902
Q9BQG0	MYBBP1A	MYB binding protein 1a	1280	S	0.463293	1.77581
Q6ICG6	KIAA0930	KIAA0930	290	T	0.455086	1.45819
Q9BUH8	BEGAIN	brain enriched guanylate kinase associated	541	S	0.443113	1.44861
Q9BY67	CADM1	cell adhesion molecule 1	448	S	0.442827	1.3851
Q9BY67	CADM1	cell adhesion molecule 1	436	T	0.442827	1.3851
P29323	EPHB2	EPH receptor B2	776	S	0.437768	1.33997
P29323	EPHB2	EPH receptor B2	775	T	0.437768	1.33997
O75534	CSDE1	cold shock domain containing E1	123	S	0.418959	1.38101
Q12767	TMEM94	transmembrane protein 94	444	S	0.411871	1.39757
Q12767	TMEM94	transmembrane protein 94	445	S	0.411871	1.39757
Q8TB72	PUM2	pumilio RNA binding family member 2	587	S	0.408234	1.36237
Q8TB72	PUM2	pumilio RNA binding family member 2	589	S	0.408234	1.36237
Q8TB72	PUM2	pumilio RNA binding family member 2	590	T	0.408234	1.36237
Q9NRF2	SH2B1	SH2B adaptor protein 1	126	S	0.390723	1.31397
Q9NRF2	SH2B1	SH2B adaptor protein 1	127	S	0.390723	1.31397
