# Supplementary material for: The Phosphoproteome of the Degenerating rd1 Retina Changes After Protein Kinase G Inhibition
Source: Preprints.org preprint supplement (doi:10.20944/preprints202305.0896.v1), 2023-05-12
Supplement: Supplementary file 3 [file Supplementary table 2.xlsx]

## Sheet: low regulated sites
lower phosphorylated sites after 4 days PKG inhibition
Unipro Accession	Gene symbol	Protein name	position	residue	FoldChange	“-log10pval”		Proteins overlapped with lower phosphorylated proteins under 4 days PKG inhibition
Q9Y6I3	EPN1	epsin 1	434	S	-3.1877	2.38077
Q9Y6I3	EPN1	epsin 1	441	S	-3.1877	2.38077
Q9Y6I3	EPN1	epsin 1	446	S	-3.1877	2.38077
Q9Y6I3	EPN1	epsin 1	450	S	-3.1877	2.38077
Q9Y6I3	EPN1	epsin 1	453	S	-3.1877	2.38077
Q16512	PKN1	protein kinase N1	577	S	-2.66775	2.8286
Q16512	PKN1	protein kinase N1	582	S	-2.66775	2.8286
Q16512	PKN1	protein kinase N1	595	S	-2.66775	2.8286
O00562	PITPNM1	phosphatidylinositol transfer protein membrane associated 1	600	S	-2.63955	1.53071
Q3KQU3	MAP7D1	MAP7 domain containing 1	401	S	-2.53031	1.41201
Q13614	MTMR2	myotubularin related protein 2	4	S	-2.22499	1.53789
Q13614	MTMR2	myotubularin related protein 2	5	S	-2.22499	1.53789
Q13614	MTMR2	myotubularin related protein 2	6	S	-2.22499	1.53789
Q13614	MTMR2	myotubularin related protein 2	9	S	-2.22499	1.53789
Q15835	GRK1	G protein-coupled receptor kinase 1	55	S	-2.18037	1.64574
Q15365	PCBP1	poly(rC) binding protein 1	189	S	-2.14413	1.47694
Q15365	PCBP1	poly(rC) binding protein 1	180	T	-2.14413	1.47694
Q9UK76	JPT1	Jupiter microtubule associated homolog 1	49	S	-2.11536	1.47368
Q9UK76	JPT1	Jupiter microtubule associated homolog 1	54	T	-2.11536	1.47368
P11171-2	EPB41	Protein 4.1 isoform 2	543	S	-2.02266	1.30666
Q9NQX3	GPHN	gephyrin	194	S	-1.83638	1.5097
O75170	PPP6R2	protein phosphatase 6 regulatory subunit 2	771	S	-1.82626	2.01323
O75170	PPP6R2	protein phosphatase 6 regulatory subunit 2	766	T	-1.82626	2.01323
O75170	PPP6R2	protein phosphatase 6 regulatory subunit 2	770	T	-1.82626	2.01323
O75369	FLNB	filamin B	2478	S	-1.76241	2.05403
O75369	FLNB	filamin B	2486	S	-1.76241	2.05403
Q5VTR2	RNF20	ring finger protein 20	517	S	-1.7474	1.40309
Q15714	TSC22D1	TSC22 domain family member 1	1036	S	-1.60246	1.79204
Q15714	TSC22D1	TSC22 domain family member 1	1049	T	-1.60246	1.79204
Q15714	TSC22D1	TSC22 domain family member 1	1055	T	-1.60246	1.79204
Q96GY3	LIN37	lin-37 DREAM MuvB core complex component	182	S	-1.59498	2.67881
Q96RK0	CIC	capicua transcriptional repressor	1511	S	-1.48	1.39363
Q96RK0	CIC	capicua transcriptional repressor	1514	S	-1.48	1.39363
Q96RK0	CIC	capicua transcriptional repressor	1521	S	-1.48	1.39363
Q08357	SLC20A2	solute carrier family 20 member 2	316	S	-1.41621	1.32224
Q13976	PRKG1	protein kinase cGMP-dependent 1	515	T	-1.38711	1.72425
Q13976	PRKG1	protein kinase cGMP-dependent 1	517	T	-1.38711	1.72425
Q13976	PRKG1	protein kinase cGMP-dependent 1	521	T	-1.38711	1.72425
Q5T5U3	ARHGAP21	Rho GTPase activating protein 21	41	S	-1.38518	1.38438
Q5T5U3	ARHGAP21	Rho GTPase activating protein 21	43	S	-1.38518	1.38438
Q5T5U3	ARHGAP21	Rho GTPase activating protein 21	49	S	-1.38518	1.38438
Q96E09	PABIR1	PP2A Aalpha (PPP2R1A) and B55A (PPP2R2A) interacting phosphatase regulator 1	170	S	-1.35616	1.40631
Q86X27	RALGPS2	Ral GEF with PH domain and SH3 binding motif 2	296	S	-1.16787	1.60502
Q6DD87	ZNF787	zinc finger protein 787	46	S	-1.14679	1.69643
P17302	GJA1	gap junction protein alpha 1	364	S	-1.14348	2.97123
P17302	GJA1	gap junction protein alpha 1	365	S	-1.14348	2.97123
Q9Y6N7	ROBO1	roundabout guidance receptor 1	903	T	-1.13175	1.69709
Q9Y6N7	ROBO1	roundabout guidance receptor 1	905	T	-1.13175	1.69709
Q02880	TOP2B	DNA topoisomerase II beta	1267	S	-1.08625	1.62474
Q02880	TOP2B	DNA topoisomerase II beta	1269	T	-1.08625	1.62474
Q02880	TOP2B	DNA topoisomerase II beta	1274	T	-1.08625	1.62474
Q02880	TOP2B	DNA topoisomerase II beta	1278	T	-1.08625	1.62474
Q02880	TOP2B	DNA topoisomerase II beta	1280	T	-1.08625	1.62474
P80723	BASP1	brain abundant membrane attached signal protein 1	180	S	-1.07256	1.49492
P80723	BASP1	brain abundant membrane attached signal protein 1	183	T	-1.07256	1.49492
P13591	NCAM1	neural cell adhesion molecule 1	946	S	-0.988489	1.31241
P13591	NCAM1	neural cell adhesion molecule 1	958	S	-0.988489	1.31241
O75475	PSIP1	PC4 and SFRS1 interacting protein 1	272	S	-0.920567	1.56173
Q16643	DBN1	drebrin 1	6	S	-0.900469	1.90566
Q16643	DBN1	drebrin 1	651	S	-0.900469	1.90566
Q16643	DBN1	drebrin 1	658	S	-0.900469	1.90566
Q16643	DBN1	drebrin 1	648	T	-0.900469	1.90566
O00512	BCL9	BCL9 transcription coactivator	291	S	-0.899672	1.98721
O00512	BCL9	BCL9 transcription coactivator	294	S	-0.899672	1.98721
O00512	BCL9	BCL9 transcription coactivator	295	S	-0.899672	1.98721
O00512	BCL9	BCL9 transcription coactivator	296	T	-0.899672	1.98721
P43007	SLC1A4	solute carrier family 1 member 4	507	S	-0.863545	1.44428
P43007	SLC1A4	solute carrier family 1 member 4	506	T	-0.863545	1.44428
Q5R3F8	ELFN2	extracellular leucine rich repeat and fibronectin type III domain containing 2	647	S	-0.84078	1.53346
Q01432	AMPD3	adenosine monophosphate deaminase 3	85	S	-0.835775	1.34275
P12270	TPR	translocated promoter region, nuclear basket protein	445	S	-0.824206	2.00902
P12270	TPR	translocated promoter region, nuclear basket protein	453	S	-0.824206	2.00902
P12270	TPR	translocated promoter region, nuclear basket protein	455	T	-0.824206	2.00902
Q3V6T2	CCDC88A	coiled-coil domain containing 88A	228	S	-0.811894	1.50779
Q3V6T2	CCDC88A	coiled-coil domain containing 88A	229	S	-0.811894	1.50779
Q3V6T2	CCDC88A	coiled-coil domain containing 88A	230	S	-0.811894	1.50779
A7KAX9	ARHGAP32	Rho GTPase activating protein 32	1405	S	-0.796325	1.89922
A7KAX9	ARHGAP32	Rho GTPase activating protein 32	1410	S	-0.796325	1.89922
Q86U86	PBRM1	polybromo 1	10	S	-0.73591	1.31013
Q86U86	PBRM1	polybromo 1	13	S	-0.73591	1.31013
Q86U86	PBRM1	polybromo 1	14	S	-0.73591	1.31013
O75038-3	None	None	1145	S	-0.693454	1.8283
Q13283	G3BP1	G3BP stress granule assembly factor 1	266	T	-0.628304	1.302
Q13283	G3BP1	G3BP stress granule assembly factor 1	268	T	-0.628304	1.302
Q96K83	ZNF521	zinc finger protein 521	546	S	-0.609298	1.37433
P23634	ATP2B4	ATPase plasma membrane Ca2+ transporting 4	1118	S	-0.592165	1.38641
P23634	ATP2B4	ATPase plasma membrane Ca2+ transporting 4	1117	T	-0.592165	1.38641
O43310	CTIF	cap binding complex dependent translation initiation factor	299	S	-0.552761	1.62269
O43310	CTIF	cap binding complex dependent translation initiation factor	302	T	-0.552761	1.62269
P46019	PHKA2	phosphorylase kinase regulatory subunit alpha 2	729	S	-0.550847	1.39036
Q9BVG9	PTDSS2	phosphatidylserine synthase 2	12	S	-0.542416	1.40806
Q9BVG9	PTDSS2	phosphatidylserine synthase 2	14	S	-0.542416	1.40806
Q9BVG9	PTDSS2	phosphatidylserine synthase 2	16	S	-0.542416	1.40806
P98164	LRP2	LDL receptor related protein 2	4624	S	-0.512519	1.52499
P98164	LRP2	LDL receptor related protein 2	4626	S	-0.512519	1.52499
P08670	VIM	vimentin	51	S	-0.497343	1.47012
P08670	VIM	vimentin	55	S	-0.497343	1.47012
P08670	VIM	vimentin	56	S	-0.497343	1.47012

## Sheet: high regulated sites
higher phosphorylated sites after 4 days PKG inhibition
Unipro Accession	Gene symbol	Protein name	position	residue	FoldChange	“-log10pval”		Proteins overlapped with higher phosphorylated proteins under 4 days PKG inhibition
O43236	SEPTIN4	septin 4	68	S	1.2662	1.5638
P11137	MAP2	microtubule associated protein 2	1539	S	0.597121	1.53364
P27816	MAP4	microtubule associated protein 4	78	S	0.82075	1.64862
P27816	MAP4	microtubule associated protein 4	79	S	0.82075	1.64862
P27816	MAP4	microtubule associated protein 4	82	T	0.82075	1.64862
P33993	MCM7	minichromosome maintenance complex component 7	41	S	0.949353	2.46013
P46821	MAP1B	microtubule associated protein 1B	1422	S	0.625488	1.80429
P46821	MAP1B	microtubule associated protein 1B	1984	S	0.850232	1.65904
P46821	MAP1B	microtubule associated protein 1B	1990	T	0.850232	1.65904
P46821	MAP1B	microtubule associated protein 1B	2006	T	0.850232	1.65904
P46821	MAP1B	microtubule associated protein 1B	1614	S	0.881948	1.81352
P46821	MAP1B	microtubule associated protein 1B	1616	S	0.881948	1.81352
P46821	MAP1B	microtubule associated protein 1B	1621	S	0.881948	1.81352
P46821	MAP1B	microtubule associated protein 1B	1662	S	1.20412	1.97184
P46821	MAP1B	microtubule associated protein 1B	1667	T	1.20412	1.97184
P46821	MAP1B	microtubule associated protein 1B	1676	T	1.20412	1.97184
P46821	MAP1B	microtubule associated protein 1B	1681	T	1.20412	1.97184
P46821	MAP1B	microtubule associated protein 1B	989	S	3.67401	2.05953
P46821	MAP1B	microtubule associated protein 1B	992	S	3.67401	2.05953
P56545-2	CTBP2	C-terminal binding protein 2	397	S	0.606221	1.45186
P56545-2	CTBP2	C-terminal binding protein 2	395	T	0.606221	1.45186
Q00839	HNRNPU	heterogeneous nuclear ribonucleoprotein U	247	S	1.04391	1.40446
Q01484	ANK2	ankyrin 2	2755	S	0.739681	1.56242
Q01484	ANK2	ankyrin 2	2726	T	0.739681	1.56242
Q12959-2	DLG1	discs large MAGUK scaffold protein 1	153	S	1.38447	2.13093
Q12959-2	DLG1	discs large MAGUK scaffold protein 1	158	S	1.38447	2.13093
Q3V6T2	CCDC88A	coiled-coil domain containing 88A	1677	S	0.664751	1.4189
Q3V6T2	CCDC88A	coiled-coil domain containing 88A	1680	S	0.664751	1.4189
Q6ICG6	KIAA0930	KIAA0930	324	S	0.708954	1.61986
Q6ICG6	KIAA0930	KIAA0930	328	S	0.708954	1.61986
Q6VMQ6	ATF7IP	activating transcription factor 7 interacting protein	593	S	0.899108	2.45349
Q8IYB3	SRRM1	serine and arginine repetitive matrix 1	401	S	0.737291	1.58684
Q8IYB3	SRRM1	serine and arginine repetitive matrix 1	404	T	0.737291	1.58684
Q9BUJ2	HNRNPUL1	heterogeneous nuclear ribonucleoprotein U like 1	195	S	2.13779	2.25952
Q9P2R6	RERE	arginine-glutamic acid dipeptide repeats	642	S	0.590648	1.64843
Q9Y2D5	PALM2AKAP2	PALM2 and AKAP2 fusion	152	S	1.76133	1.4001
A1X283	SH3PXD2B	SH3 and PX domains 2B	500	S	0.748515	1.41811
A1X283	SH3PXD2B	SH3 and PX domains 2B	503	S	0.748515	1.41811
A1X283	SH3PXD2B	SH3 and PX domains 2B	506	T	0.748515	1.41811
O00151	PDLIM1	PDZ and LIM domain 1	183	S	0.88732	1.49306
O00151	PDLIM1	PDZ and LIM domain 1	185	S	0.88732	1.49306
O00151	PDLIM1	PDZ and LIM domain 1	165	T	0.88732	1.49306
O14639	ABLIM1	actin binding LIM protein 1	752	S	1.84242	1.50711
O14639	ABLIM1	actin binding LIM protein 1	760	S	1.84242	1.50711
O14639	ABLIM1	actin binding LIM protein 1	765	S	1.84242	1.50711
O14639	ABLIM1	actin binding LIM protein 1	753	T	1.84242	1.50711
O15014	ZNF609	zinc finger protein 609	757	S	0.786815	1.36941
O15027	SEC16A	SEC16 homolog A, endoplasmic reticulum export factor	1383	S	0.73574	1.44974
O15027	SEC16A	SEC16 homolog A, endoplasmic reticulum export factor	1384	S	0.73574	1.44974
O15042	U2SURP	U2 snRNP associated SURP domain containing	67	S	0.512344	1.39198
O15042	U2SURP	U2 snRNP associated SURP domain containing	73	S	0.512344	1.39198
O15047	SETD1A	SET domain containing 1A, histone lysine methyltransferase	477	S	0.924033	1.30464
O15047	SETD1A	SET domain containing 1A, histone lysine methyltransferase	471	T	0.924033	1.30464
O43399	TPD52L2	TPD52 like 2	19	S	1.94553	2.00782
O43399	TPD52L2	TPD52 like 2	23	T	1.94553	2.00782
O60260	PRKN	parkin RBR E3 ubiquitin protein ligase	6	S	1.04333	2.38758
O60260	PRKN	parkin RBR E3 ubiquitin protein ligase	83	S	1.04333	2.38758
O75386	TULP3	TUB like protein 3	372	S	0.584547	1.64753
O94888	UBXN7	UBX domain protein 7	373	S	0.504612	1.45779
O94967	WDR47	WD repeat domain 47	312	S	0.954267	2.59597
O95155	UBE4B	ubiquitination factor E4B	52	S	1.2339	1.92456
O95155	UBE4B	ubiquitination factor E4B	65	S	1.2339	1.92456
O95251	KAT7	lysine acetyltransferase 7	59	S	0.619492	1.39817
O95391	SLU7	SLU7 homolog, splicing factor	215	S	0.81704	1.37424
P05771	PRKCB	protein kinase C beta	654	S	1.46962	1.53907
P05771	PRKCB	protein kinase C beta	660	S	1.46962	1.53907
P12277	CKB	creatine kinase B	199	S	1.34955	1.38146
P12277	CKB	creatine kinase B	180	T	1.34955	1.38146
P13521	SCG2	secretogranin II	270	S	0.786186	2.04319
P14625	HSP90B1	heat shock protein 90 beta family member 1	306	S	1.62491	2.8425
P15104	GLUL	glutamate-ammonia ligase	343	S	1.53878	3.99376
P23588	EIF4B	eukaryotic translation initiation factor 4B	497	S	0.686592	2.02648
P24821	TNC	tenascin C	70	S	0.892799	1.88611
P24821	TNC	tenascin C	72	S	0.892799	1.88611
P27816-4	MAP4-4	Microtubule-associated protein 4 isoform 4	243	S	1.58252	1.30937
P27816-4	MAP4-4	Microtubule-associated protein 4 isoform 4	248	T	1.58252	1.30937
P27816-4	MAP4-4	Microtubule-associated protein 4 isoform 4	249	T	1.58252	1.30937
P27816-4	MAP4-4	Microtubule-associated protein 4 isoform 4	254	T	1.58252	1.30937
P35269	GTF2F1	general transcription factor IIF subunit 1	224	S	2.11497	1.81363
P35568	IRS1	insulin receptor substrate 1	1096	S	0.78597	1.69457
P35580	MYH10	myosin heavy chain 10	1956	S	1.09113	1.64627
P35580	MYH10	myosin heavy chain 10	1960	T	1.09113	1.64627
P40925	MDH1	malate dehydrogenase 1	241	S	0.721194	1.49667
P40925	MDH1	malate dehydrogenase 1	242	S	0.982423	2.06186
P45985	MAP2K4	mitogen-activated protein kinase kinase 4	249	S	0.731278	1.49192
P45985	MAP2K4	mitogen-activated protein kinase kinase 4	255	S	0.731278	1.49192
P46937	YAP1	Yes1 associated transcriptional regulator	112	S	0.502721	1.31352
P46937	YAP1	Yes1 associated transcriptional regulator	113	S	0.502721	1.31352
P46937	YAP1	Yes1 associated transcriptional regulator	116	S	0.502721	1.31352
P50552	VASP	vasodilator stimulated phosphoprotein	317	S	1.51509	2.48025
P50552	VASP	vasodilator stimulated phosphoprotein	318	S	1.51509	2.48025
P50552	VASP	vasodilator stimulated phosphoprotein	319	S	1.51509	2.48025
P50552	VASP	vasodilator stimulated phosphoprotein	330	T	1.51509	2.48025
P54259	ATN1	atrophin 1	112	S	0.686761	1.76542
P55884	EIF3B	eukaryotic translation initiation factor 3 subunit B	88	S	0.645379	1.38766
P55884	EIF3B	eukaryotic translation initiation factor 3 subunit B	90	S	0.645379	1.38766
P58304	VSX2	visual system homeobox 2	122	S	1.94515	1.54529
P58304	VSX2	visual system homeobox 2	123	S	1.94515	1.54529
P58304	VSX2	visual system homeobox 2	120	T	1.94515	1.54529
P63104	YWHAZ	tyrosine 3-monooxygenase/tryptophan 5-monooxygenase activation protein zeta	207	S	1.1929	2.04976
P63104	YWHAZ	tyrosine 3-monooxygenase/tryptophan 5-monooxygenase activation protein zeta	210	S	1.1929	2.04976
P67809	YBX1	Y-box binding protein 1	172	S	0.970638	1.87846
P67809	YBX1	Y-box binding protein 1	174	S	0.970638	1.87846
Q01831	XPC	XPC complex subunit, DNA damage recognition and repair factor	342	S	1.25418	1.36465
Q01831	XPC	XPC complex subunit, DNA damage recognition and repair factor	343	S	1.25418	1.36465
Q01831	XPC	XPC complex subunit, DNA damage recognition and repair factor	346	S	1.25418	1.36465
Q01831	XPC	XPC complex subunit, DNA damage recognition and repair factor	349	S	1.25418	1.36465
Q10713	PMPCA	peptidase, mitochondrial processing subunit alpha	245	S	0.673469	1.55319
Q12802	AKAP13	A-kinase anchoring protein 13	1569	S	0.793369	1.35116
Q13185	CBX3	chromobox 3	95	S	1.07962	1.30378
Q13285	NR5A1	nuclear receptor subfamily 5 group A member 1	80	S	2.12797	3.09591
Q13285	NR5A1	nuclear receptor subfamily 5 group A member 1	82	S	2.12797	3.09591
Q13522	PPP1R1A	protein phosphatase 1 regulatory inhibitor subunit 1A	46	S	0.888208	1.61156
Q13541	EIF4EBP1	eukaryotic translation initiation factor 4E binding protein 1	100	S	1.64677	1.7229
Q13541	EIF4EBP1	eukaryotic translation initiation factor 4E binding protein 1	69	T	1.64677	1.7229
Q14019	COTL1	coactosin like F-actin binding protein 1	141	S	1.01152	1.9513
Q14498	RBM39	RNA binding motif protein 39	97	S	0.714305	1.73927
Q15185	PTGES3	prostaglandin E synthase 3	113	S	1.38073	1.84452
Q15365	PCBP1	poly(rC) binding protein 1	171	S	1.26924	1.56139
Q15365	PCBP1	poly(rC) binding protein 1	173	S	1.26924	1.56139
Q15723	ELF2	E74 like ETS transcription factor 2	185	S	1.7775	1.62192
Q16629	SRSF7	serine and arginine rich splicing factor 7	210	S	0.760564	1.41518
Q16629	SRSF7	serine and arginine rich splicing factor 7	212	S	0.760564	1.41518
Q1KMD3	HNRNPUL2	heterogeneous nuclear ribonucleoprotein U like 2	226	S	0.799354	1.58
Q2M3C7	SPHKAP	SPHK1 interactor, AKAP domain containing	1403	S	0.772658	2.13336
Q53ET0	CRTC2	CREB regulated transcription coactivator 2	64	S	0.90843	1.91465
Q53ET0	CRTC2	CREB regulated transcription coactivator 2	65	S	0.90843	1.91465
Q53ET0	CRTC2	CREB regulated transcription coactivator 2	70	S	0.90843	1.91465
Q5JRA6	MIA3	MIA SH3 domain ER export factor 3	1915	S	0.661899	1.61836
Q5T5Y3	CAMSAP1	calmodulin regulated spectrin associated protein 1	469	S	1.11532	1.57899
Q5T5Y3	CAMSAP1	calmodulin regulated spectrin associated protein 1	473	S	1.11532	1.57899
Q5T5Y3	CAMSAP1	calmodulin regulated spectrin associated protein 1	481	S	1.11532	1.57899
Q5T5Y3	CAMSAP1	calmodulin regulated spectrin associated protein 1	472	T	1.11532	1.57899
Q5VWG9	TAF3	TATA-box binding protein associated factor 3	204	S	0.951663	2.98561
Q5VYS8	TUT7	terminal uridylyl transferase 7	705	S	0.709817	1.40771
Q66K74	MAP1S	microtubule associated protein 1S	670	S	0.662094	1.34982
Q6AI39	BICRAL	BRD4 interacting chromatin remodeling complex associated protein like	669	S	1.77123	1.32778
Q6AI39	BICRAL	BRD4 interacting chromatin remodeling complex associated protein like	673	S	1.77123	1.32778
Q6AI39	BICRAL	BRD4 interacting chromatin remodeling complex associated protein like	675	S	1.77123	1.32778
Q6AI39	BICRAL	BRD4 interacting chromatin remodeling complex associated protein like	677	T	1.77123	1.32778
Q6GYQ0	RALGAPA1	Ral GTPase activating protein catalytic subunit alpha 1	859	S	0.860693	1.45572
Q6GYQ0	RALGAPA1	Ral GTPase activating protein catalytic subunit alpha 1	860	S	0.860693	1.45572
Q6NYC8	PPP1R18	protein phosphatase 1 regulatory subunit 18	234	S	0.60863	1.42326
Q6NYC8	PPP1R18	protein phosphatase 1 regulatory subunit 18	236	T	0.60863	1.42326
Q6P1L5	FAM117B	family with sequence similarity 117 member B	444	S	0.604974	1.83893
Q6P1L5	FAM117B	family with sequence similarity 117 member B	132	S	1.50818	1.49368
Q6P1L5	FAM117B	family with sequence similarity 117 member B	147	S	1.50818	1.49368
Q6P1L5	FAM117B	family with sequence similarity 117 member B	148	S	1.50818	1.49368
Q6PD74	AAGAB	alpha and gamma adaptin binding protein	211	S	0.805751	1.65395
Q6TDP4	KLHL17	kelch like family member 17	12	T	1.08495	1.32665
Q7RTP6	MICAL3	microtubule associated monooxygenase, calponin and LIM domain containing 3	977	S	0.674371	1.77468
Q7Z3U7	MON2	MON2 homolog, regulator of endosome-to-Golgi trafficking	204	S	1.19395	2.08532
Q7Z3U7	MON2	MON2 homolog, regulator of endosome-to-Golgi trafficking	206	S	1.19395	2.08532
Q86VP1	TAX1BP1	Tax1 binding protein 1	693	S	0.699415	1.37561
Q86VP3	PACS2	phosphofurin acidic cluster sorting protein 2	297	S	1.70494	1.54412
Q86VP3	PACS2	phosphofurin acidic cluster sorting protein 2	299	S	1.70494	1.54412
Q86VP3	PACS2	phosphofurin acidic cluster sorting protein 2	300	S	1.70494	1.54412
Q86VP3	PACS2	phosphofurin acidic cluster sorting protein 2	301	S	1.70494	1.54412
Q86VP3	PACS2	phosphofurin acidic cluster sorting protein 2	303	T	1.70494	1.54412
Q86Y13	DZIP3	DAZ interacting zinc finger protein 3	1105	S	1.89689	1.67758
Q8IU81	IRF2BP1	interferon regulatory factor 2 binding protein 1	384	S	0.642091	1.38572
Q8IVA1	PCP2	Purkinje cell protein 2	111	S	0.981195	2.32743
Q8IVA1	PCP2	Purkinje cell protein 2	112	S	0.981195	2.32743
Q8IWE5	PLEKHM2	pleckstrin homology and RUN domain containing M2	423	S	1.40535	1.91224
Q8IWE5	PLEKHM2	pleckstrin homology and RUN domain containing M2	437	S	1.40535	1.91224
Q8IX07	ZFPM1	zinc finger protein, FOG family member 1	648	S	0.936468	1.68238
Q8IXJ6	SIRT2	sirtuin 2	372	S	0.681863	1.50298
Q8IY57	YAF2	YY1 associated factor 2	173	S	0.629018	1.67987
Q8IZD0	SAMD14	sterile alpha motif domain containing 14	256	S	0.627217	1.57054
Q8IZD0	SAMD14	sterile alpha motif domain containing 14	260	S	0.627217	1.57054
Q8IZD2	KMT2E	lysine methyltransferase 2E (inactive)	1364	S	0.858003	1.62408
Q8TDJ6	DMXL2	Dmx like 2	1856	S	0.740756	1.97417
Q8TF01	PNISR	PNN interacting serine and arginine rich protein	311	S	1.19612	1.69638
Q8TF01	PNISR	PNN interacting serine and arginine rich protein	313	S	1.19612	1.69638
Q8TF01	PNISR	PNN interacting serine and arginine rich protein	4	T	1.19612	1.69638
Q8WXG6	MADD	MAP kinase activating death domain	819	S	0.922925	1.4881
Q96B23	C18orf25	chromosome 18 open reading frame 25	145	S	1.2088	1.50682
Q96D71	REPS1	RALBP1 associated Eps domain containing 1	539	S	0.916238	2.62566
Q96DT0-2	LGALS12	galectin 12	327	S	2.27864	1.79226
Q96DT0-2	LGALS12	galectin 12	334	S	2.27864	1.79226
Q96DT0-2	LGALS12	galectin 12	337	S	2.27864	1.79226
Q96DT0-2	LGALS12	galectin 12	6	T	2.27864	1.79226
Q96MU7	YTHDC1	YTH domain containing 1	417	S	0.834686	1.43591
Q96MU7	YTHDC1	YTH domain containing 1	418	S	0.834686	1.43591
Q96MU7	YTHDC1	YTH domain containing 1	420	S	0.834686	1.43591
Q96MU7	YTHDC1	YTH domain containing 1	425	S	0.834686	1.43591
Q96N67	DOCK7	dedicator of cytokinesis 7	896	S	1.15775	1.39878
Q96N67	DOCK7	dedicator of cytokinesis 7	898	S	1.15775	1.39878
Q96N67	DOCK7	dedicator of cytokinesis 7	900	S	1.15775	1.39878
Q96N67	DOCK7	dedicator of cytokinesis 7	905	S	1.15775	1.39878
Q96N67	DOCK7	dedicator of cytokinesis 7	907	T	1.15775	1.39878
Q96RU3	FNBP1	formin binding protein 1	496	S	1.46289	2.27187
Q9BPY8	HOPX	HOP homeobox	61	S	0.64447	1.6751
Q9BRD0	BUD13	BUD13 homolog	226	S	0.802443	1.4607
Q9BRD0	BUD13	BUD13 homolog	222	T	0.802443	1.4607
Q9BRD0	BUD13	BUD13 homolog	297	S	0.959963	2.11915
Q9BZ72	PITPNM2	phosphatidylinositol transfer protein membrane associated 2	396	S	1.82749	1.54619
Q9BZ72	PITPNM2	phosphatidylinositol transfer protein membrane associated 2	397	S	1.82749	1.54619
Q9BZ72	PITPNM2	phosphatidylinositol transfer protein membrane associated 2	409	S	1.82749	1.54619
Q9C040	TRIM2	tripartite motif containing 2	456	S	0.785359	1.40142
Q9C0H9	SRCIN1	SRC kinase signaling inhibitor 1	1222	S	0.795159	1.75465
Q9H1E3	NUCKS1	nuclear casein kinase and cyclin dependent kinase substrate 1	58	S	0.997541	1.49739
Q9H1E3	NUCKS1	nuclear casein kinase and cyclin dependent kinase substrate 1	61	S	0.997541	1.49739
Q9H1K0	RBSN	rabenosyn, RAB effector	210	S	2.00554	1.58516
Q9H1K0	RBSN	rabenosyn, RAB effector	214	S	2.00554	1.58516
Q9H3Z4	DNAJC5	DnaJ heat shock protein family (Hsp40) member C5	8	S	1.70718	1.54669
Q9H3Z4	DNAJC5	DnaJ heat shock protein family (Hsp40) member C5	12	S	1.70718	1.54669
Q9H3Z4	DNAJC5	DnaJ heat shock protein family (Hsp40) member C5	15	S	1.70718	1.54669
Q9H3Z4	DNAJC5	DnaJ heat shock protein family (Hsp40) member C5	11	T	1.70718	1.54669
Q9H7P6	MVB12B	multivesicular body subunit 12B	222	S	0.82992	1.36087
Q9H7P6	MVB12B	multivesicular body subunit 12B	224	T	0.82992	1.36087
Q9NQG5	RPRD1B	regulation of nuclear pre-mRNA domain containing 1B	164	S	1.14071	1.43379
Q9NQG5	RPRD1B	regulation of nuclear pre-mRNA domain containing 1B	166	S	1.14071	1.43379
Q9NQG5	RPRD1B	regulation of nuclear pre-mRNA domain containing 1B	171	S	1.14071	1.43379
Q9NTI5	PDS5B	PDS5 cohesin associated factor B	1381	S	0.609001	1.79824
Q9NTZ6	RBM12	RNA binding motif protein 12	424	S	1.91508	2.11798
Q9P0L2	MARK1	microtubule affinity regulating kinase 1	423	S	0.662441	1.31527
Q9P0L2	MARK1	microtubule affinity regulating kinase 1	429	S	0.662441	1.31527
Q9P270	SLAIN2	SLAIN motif family member 2	434	S	1.22055	1.30792
Q9P270	SLAIN2	SLAIN motif family member 2	436	S	1.22055	1.30792
Q9UDT6	CLIP2	CAP-Gly domain containing linker protein 2	155	S	1.12699	1.37962
Q9UDT6	CLIP2	CAP-Gly domain containing linker protein 2	159	T	1.12699	1.37962
Q9UDT6	CLIP2	CAP-Gly domain containing linker protein 2	176	T	1.12699	1.37962
Q9UDT6	CLIP2	CAP-Gly domain containing linker protein 2	178	T	1.12699	1.37962
Q9UEY8	ADD3	adducin 3	419	S	1.04242	1.75614
Q9UEY8	ADD3	adducin 3	423	S	1.04242	1.75614
Q9UEY8	ADD3	adducin 3	409	T	1.04242	1.75614
Q9UEY8	ADD3	adducin 3	411	T	1.04242	1.75614
Q9UGV2	NDRG3	NDRG family member 3	331	S	0.967549	1.61633
Q9UGV2	NDRG3	NDRG family member 3	333	S	0.967549	1.61633
Q9UGV2	NDRG3	NDRG family member 3	334	S	0.967549	1.61633
Q9UGV2	NDRG3	NDRG family member 3	335	S	0.967549	1.61633
Q9UGV2	NDRG3	NDRG family member 3	338	S	0.967549	1.61633
Q9UGV2	NDRG3	NDRG family member 3	329	T	0.967549	1.61633
Q9UI08	EVL	Enah/Vasp-like	302	S	1.07695	1.30649
Q9UK58	CCNL1	cyclin L1	451	S	1.65014	2.76755
Q9UKE5	TNIK	TRAF2 and NCK interacting kinase	659	S	0.701471	1.61656
Q9UKI8	TLK1	tousled like kinase 1	38	T	0.906603	1.57764
Q9UMX1	SUFU	SUFU negative regulator of hedgehog signaling	346	S	0.621124	1.74161
Q9UMX1	SUFU	SUFU negative regulator of hedgehog signaling	349	S	0.621124	1.74161
Q9UMX1	SUFU	SUFU negative regulator of hedgehog signaling	351	S	0.621124	1.74161
Q9UMX1	SUFU	SUFU negative regulator of hedgehog signaling	352	S	0.621124	1.74161
Q9UPP1	PHF8	PHD finger protein 8	931	S	0.969759	1.58222
Q9UPP1	PHF8	PHD finger protein 8	932	S	0.969759	1.58222
Q9UPP1	PHF8	PHD finger protein 8	915	T	0.969759	1.58222
Q9UPP1	PHF8	PHD finger protein 8	924	T	0.969759	1.58222
Q9UPP1	PHF8	PHD finger protein 8	929	T	0.969759	1.58222
Q9UPQ0	LIMCH1	LIM and calponin homology domains 1	973	S	1.04642	1.76973
Q9UPT8	ZC3H4	zinc finger CCCH-type containing 4	1270	S	0.619342	1.31228
Q9UPT8	ZC3H4	zinc finger CCCH-type containing 4	1276	S	0.619342	1.31228
Q9UQ26	RIMS2	regulating synaptic membrane exocytosis 2	375	S	0.728368	2.1869
Q9UQ35	SRRM2	serine/arginine repetitive matrix 2	955	T	0.74008	2.175
Q9UQ35	SRRM2	serine/arginine repetitive matrix 2	2362	T	0.78588	2.14403
Q9UQ35	SRRM2	serine/arginine repetitive matrix 2	2638	S	0.854882	2.03506
Q9UQ35	SRRM2	serine/arginine repetitive matrix 2	2642	S	0.854882	2.03506
Q9UQ35	SRRM2	serine/arginine repetitive matrix 2	1495	S	2.04106	4.18939
Q9UQ35	SRRM2	serine/arginine repetitive matrix 2	1497	S	2.04106	4.18939
Q9UQ35	SRRM2	serine/arginine repetitive matrix 2	1508	S	2.04106	4.18939
Q9Y2H2	INPP5F	inositol polyphosphate-5-phosphatase F	941	S	0.734146	1.53151
Q9Y2H2	INPP5F	inositol polyphosphate-5-phosphatase F	943	S	0.734146	1.53151
Q9Y4G8	RAPGEF2	Rap guanine nucleotide exchange factor 2	583	S	0.807929	1.80577
Q9Y4G8	RAPGEF2	Rap guanine nucleotide exchange factor 2	585	S	0.807929	1.80577
Q9Y6X4	FAM169A	family with sequence similarity 169 member A	630	S	0.784708	1.30618
Q9Y6X4	FAM169A	family with sequence similarity 169 member A	631	S	0.784708	1.30618
Q9Y6X4	FAM169A	family with sequence similarity 169 member A	632	S	0.784708	1.30618
