# Supplementary material for: The Phosphoproteome of the Degenerating rd1 Retina Changes After Protein Kinase G Inhibition
Source: Preprints.org preprint supplement (doi:10.20944/preprints202305.0896.v1), 2023-05-12
Supplement: Supplementary file 4 [file supplementary table 3.xlsx]

## Sheet: low
Kinase	foldChange	“-log10pval”	site specific
PRKAA2	-2.89393	1.92075
DYRK1A	-2.05131	1.88075	√
CDKL5	-2.05131	1.88075
PLK1	-1.3297	2.71539
CDK1	-1.23281	3.53783	√
CHUK	-1.19928	2.1368
MASTL	-1.17276	1.44191
CDK5	-1.08188	2.75853	√
MAP3K8	-0.941367	1.69166
ATR	-0.888919	3.28521
AURKB	-0.876081	2.32864
MAP3K7	-0.874437	2.21751
MARK2	-0.874437	2.21751
CHEK2	-0.846135	2.61303
CDK4	-0.846135	2.61303
CDK6	-0.846135	2.61303
CAMK2A	-0.807113	2.84038
PRKG1	-0.716084	1.56636
BTK	-0.716084	1.56636
AKT1	-0.705751	1.42822	√
CDK2	-0.705751	1.42822	√
LMTK2	-0.705751	1.42822	√
CSNK2A1	-0.694059	2.0453
CDK7	-0.692901	1.84942
CDK9	-0.692901	1.84942
JAK2	-0.635699	1.80582
CAMK4	-0.59405	2.3359
CSNK1D	-0.586796	1.58643
PRKACA	-0.583946	5.37742	√
CAMK2G	-0.555315	1.31426
MAPK11	-0.555315	1.31426
PKN3	-0.555315	1.31426

## Sheet: high
Kinase	foldChange	“-log10pval”	site specific
CSNK2A1	2.59266	2.09911	√
CSNK2A2	2.59266	2.09911	√
MTOR	1.39794	1.38113
PTK2	1.28443	2.69888
PAK4	1.28443	2.69888
PAK1	1.16093	2.70856
MAPK8	1.15986	2.77105
BCR	1.00029	1.63271
PAK2	0.913463	2.2322
MAPK14	0.904237	2.94931
FGFR1	0.886184	2.18404
SYK	0.886184	2.18404
PRKCI	0.886184	2.18404
PTK2B	0.886184	2.18404
ROCK2	0.884131	2.21161
ILK	0.884131	2.21161
NUAK1	0.884131	2.21161
RAF1	0.884131	2.21161
MAP2K7	0.883467	1.52902	√
MAP2K4	0.883467	1.52902	√
MAP3K6	0.883467	1.52902	√
MAP3K5	0.883467	1.52902	√
RET	0.883467	1.52902
FER	0.793773	2.32292
GSK3B	0.737923	2.19427
ABL1	0.730014	2.10786
GRK1	0.710956	1.42634	√
CSNK1E	0.707563	1.5151	√
PRKCE	0.707563	1.5151	√
MET	0.608952	1.75834
INSR	0.608952	1.75834
LYN	0.57558	1.63599
MAPK3	0.512273	1.56938	√
MAPK1	0.512273	1.56938	√
