# Supplementary material for: The Phosphoproteome of the Degenerating rd1 Retina Changes After Protein Kinase G Inhibition
Source: Preprints.org preprint supplement (doi:10.20944/preprints202305.0896.v1), 2023-05-12
Supplement: Supplementary file 5 [file supplementary table 4.xlsx]

## Sheet: lower
Kinase	foldChange	“-log10pval”	site specific
PKN1	-2.66775	2.11214
PRKCE	-1.14348	2.83697	√
PRKCE	-1.14348	2.83697
MAPK7	-1.14348	2.83697
CDK1	-0.940316	2.57139	√
CDC7	-0.920567	1.32715
MAPK3	-0.719708	1.50348
MAPK1	-0.587383	1.66476
PRKACA	-0.540794	2.63485	√

## Sheet: higher
Kinase	foldChange	“-log10pval”	site specific
CDK7	2.12797	2.38607
GTF2F1	2.11497	1.36587
CHEK1	2.04106	3.44814	√
CSNK2A2	1.64677	1.32306
RPS6KA5	1.64677	1.32306
DYRK2	1.64677	1.32306
MAP3K8	1.64677	1.32306
PRKD1	1.51509	1.98711
PRKD2	1.51509	1.98711
ALK	1.51509	1.98711
PRKAA2	1.2551	3.90222
MTOR	1.22234	3.03395
BCR	1.1929	1.69397
CSNK2A1	1.18767	1.50577	√
MAP3K7	1.15575	2.52069
PRKCD	1.05725	2.02102
CHEK1	1.0501	2.85071
PINK1	1.04333	2.17198
CDK2	1.04242	1.4682	√
MAPK10	1.02418	2.15429
PRKAA1	0.99779	5.13766
MAPK8	0.964631	2.36941
MAPK9	0.964631	2.36941
CSNK1E	0.960341	1.64582
CSNK2A1	0.950217	1.66856
LYN	0.949353	2.42222
SIK1	0.90843	1.72769	√
SIK3	0.90843	1.72769	√
SIK1	0.90843	1.72769
SIK3	0.90843	1.72769
SIK2	0.877815	2.53637
MAPK14	0.831102	1.45434
CDK2	0.813283	3.15261
IKBKB	0.800609	2.52118
INSR	0.78597	1.58225
IGF1R	0.78597	1.58225
CSNK2B	0.78597	1.58225
MAP2K7	0.78597	1.58225
MAP2K1	0.78597	1.58225
PIM2	0.78597	1.58225
PIM3	0.78597	1.58225
MET	0.78597	1.58225
ATR	0.78597	1.58225
PIM1	0.78597	1.58225
MARK1	0.764843	1.55515
PRKCZ	0.746067	2.16307
RPS6KB1	0.736281	2.13862
ULK1	0.73574	1.325
ULK2	0.73574	1.325
MAP3K11	0.731278	1.38205
MAP2K4	0.731278	1.38205
MAP3K5	0.731278	1.38205
MAP3K1	0.731278	1.38205
SGK1	0.731278	1.38205
MELK	0.686592	2.44408
FYN	0.597121	1.69766
CSNK1A1	0.574263	2.02919
LATS1	0.502721	1.57389
LATS2	0.502721	1.57389
AURKA	0.502721	1.57389
STK38	0.502721	1.57389
STK38L	0.502721	1.57389
IKBKE	0.502721	1.57389
NLK	0.502721	1.57389
STK3	0.502721	1.57389
